# Supplementary material for: Gold nanoparticles optical properties induced by water and an ionic liquid (bmimBF4) inside cationic reverse micelles
Source: Royal Society of Chemistry journal article supplement (doi:10.1039/c7nj01106g), 2017-01-01
Supplement: c7nj01106g1.pdf [file c7nj01106g1.pdf]

## Electronic supplementary information (ESI)

### Gold nanoparticles optical properties induced by water and ionic liquid (bmimBF<sub>4</sub>) inside cationic reverse micelles.

*Diana Blach\* and Fernando Martínez.\**

**Table S1.** Apparent diameter ( $d_{app}$ ) values for bmimBF<sub>4</sub>/BHDC/toluene and water/BHDC/toluene RMs obtained at 25 °C varying W and [BHDC] = 0.1 M.

| bmimBF <sub>4</sub> /BHDC/toluene |                       | water/BHDC/toluene |                       |
|-----------------------------------|-----------------------|--------------------|-----------------------|
| W <sub>s</sub>                    | d <sub>app</sub> (nm) | W <sub>0</sub>     | d <sub>app</sub> (nm) |
| 0,3                               | 3,2 ± 0,2             | 3                  | 3,5 ± 0,5             |
| 0,5                               | 5,3 ± 0,1             | 5                  | 4,1 ± 0,3             |
| 0,7                               | 8,4 ± 0,1             | 6                  | 4,6 ± 0,1             |
| 1                                 | 10,2 ± 0,3            | 8                  | 5,5 ± 0,6             |
| 1,2                               | 15,2 ± 0,5            | 10                 | 6,7 ± 0,1             |

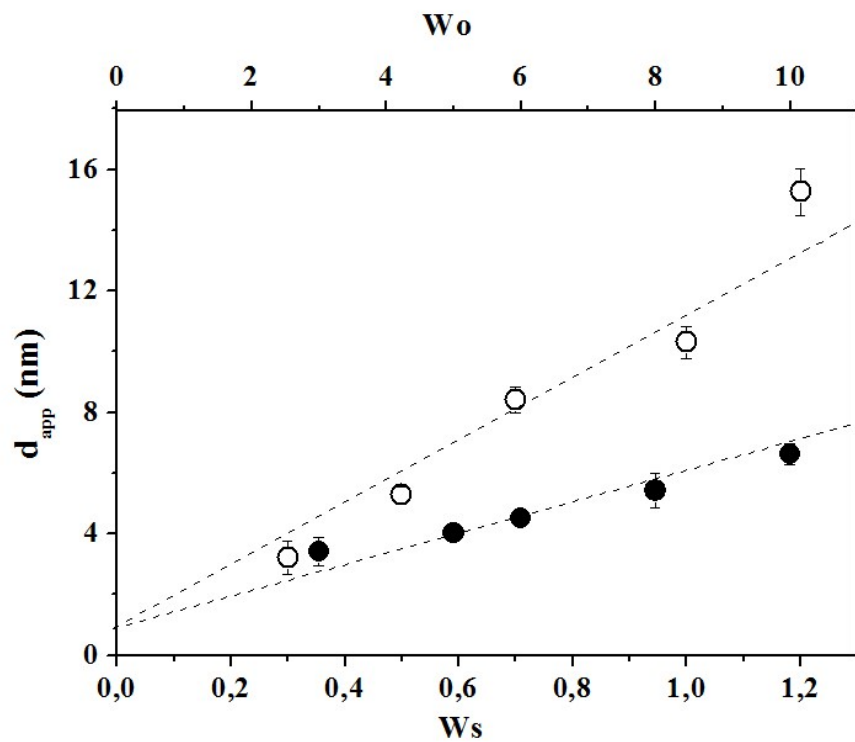

**Figure S1.** Apparent diameter ( $d_{app}$ ) values for  $bmimBF_4$ /BHDC/toluene (○) and water/BHDC/toluene (●) at different W obtained at 25 °C and  $[BHDC] = 0.1$  M.

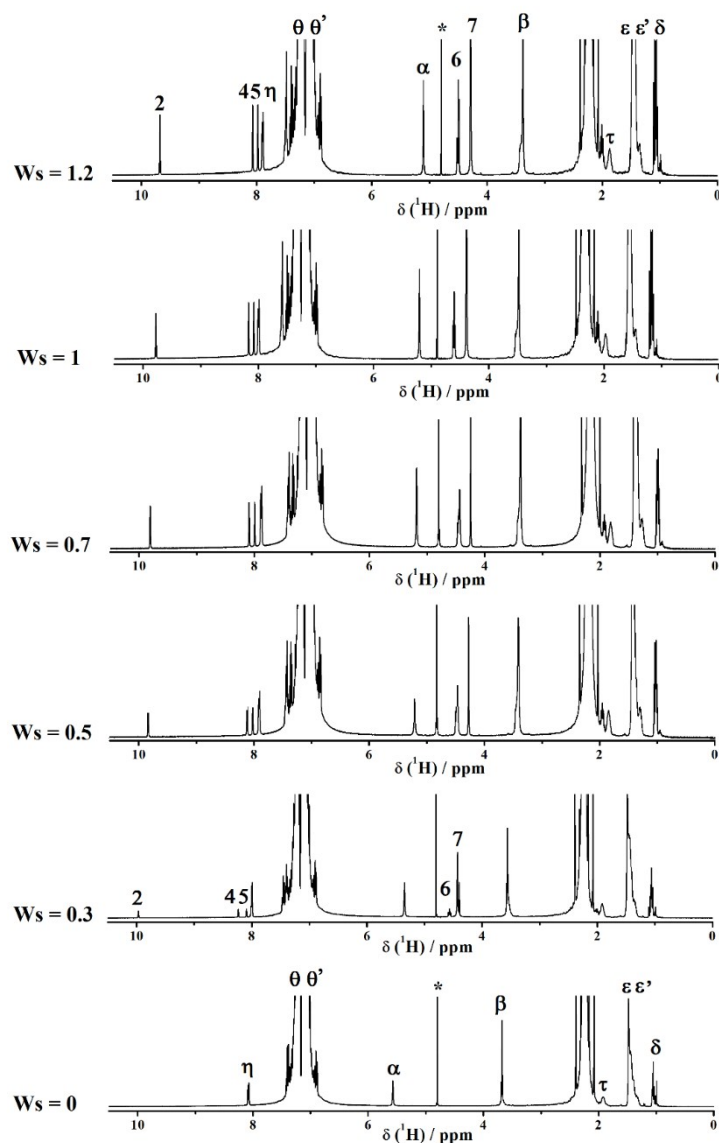

**Figure S2.**  $^1\text{H}$  NMR spectra for  $\text{bmimBF}_4/\text{BHDC}/\text{toluene}$  RMs at different  $W_s$  values and  $[\text{BHDC}] = 0.1 \text{ M}$ . Labels refer to Scheme 1. A capillary tube containing  $\text{D}_2\text{O}$  was used as a frequency “lock”, the solvent signal is evident, indicated by \*.

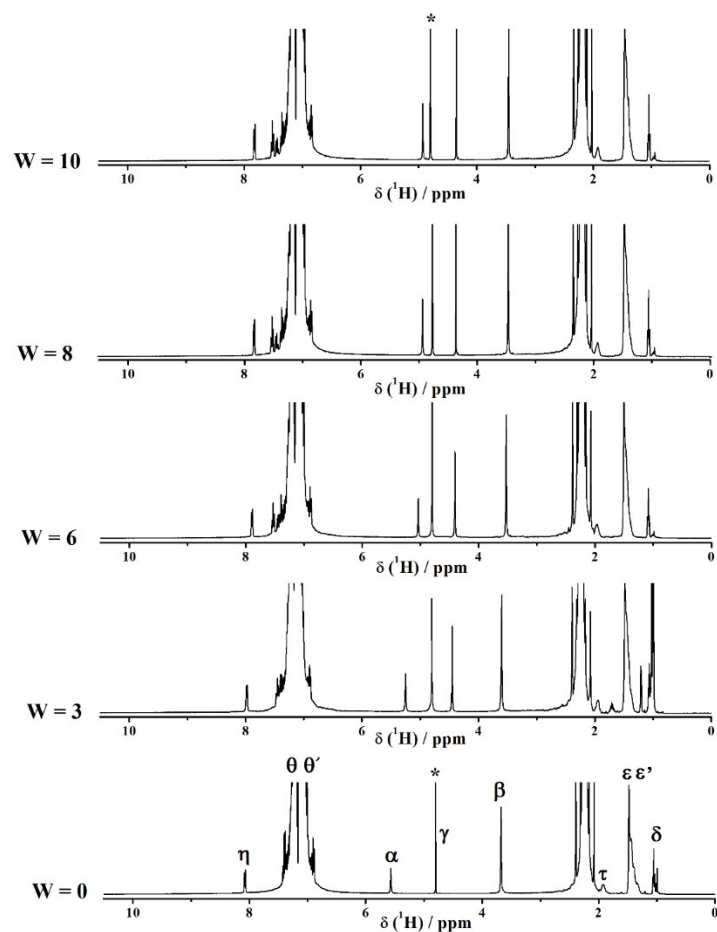

**Figure S3.**  $^1\text{H}$  NMR spectra for water/BHDC/toluene RMs at different  $W_0$  values and  $[\text{BHDC}] = 0.1 \text{ M}$ . Labels refer to Scheme 1. A capillary tube containing  $\text{D}_2\text{O}$  was used as a frequency “lock”, the solvent signal is evident, indicated by \*.

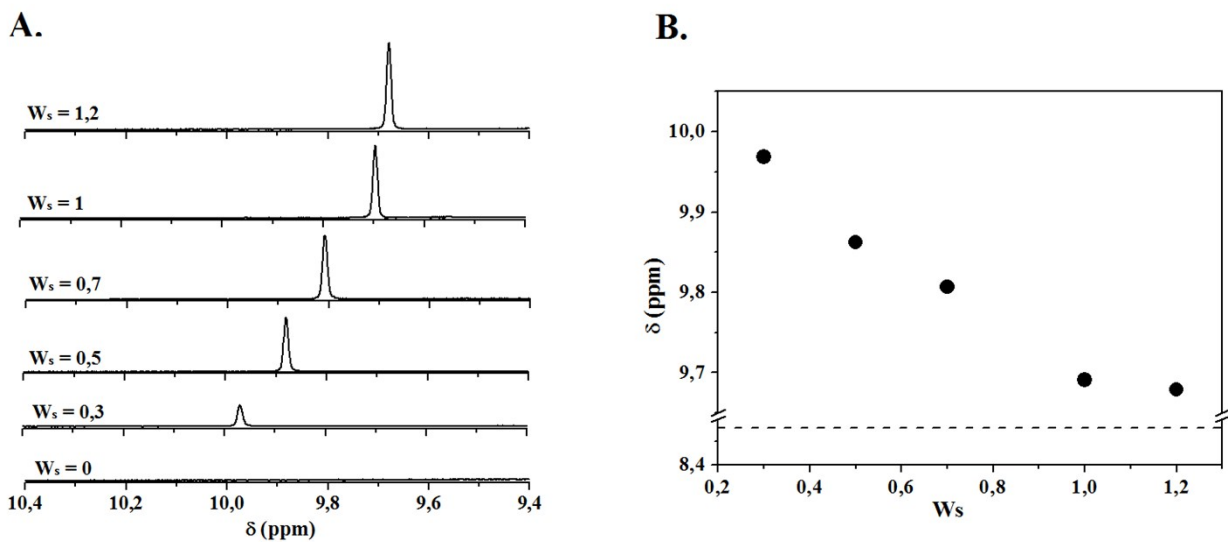

**Figure S4.** A).  $^1\text{H}$ -NMR spectra of  $\text{bmimBF}_4$  in BHDC RMs and B).  $^1\text{H}$ -NMR chemical shifts of C2-H  $\text{bmim}^+$  in  $\text{bmimBF}_4/\text{BHDC}/\text{toluene}$  RMs at different  $\text{bmimBF}_4$  contents ( $W_s$ ).  $[\text{BHDC}] = 0.1 \text{ M}$ . The corresponding value for neat  $\text{bmimBF}_4$  (----) is included for comparison.

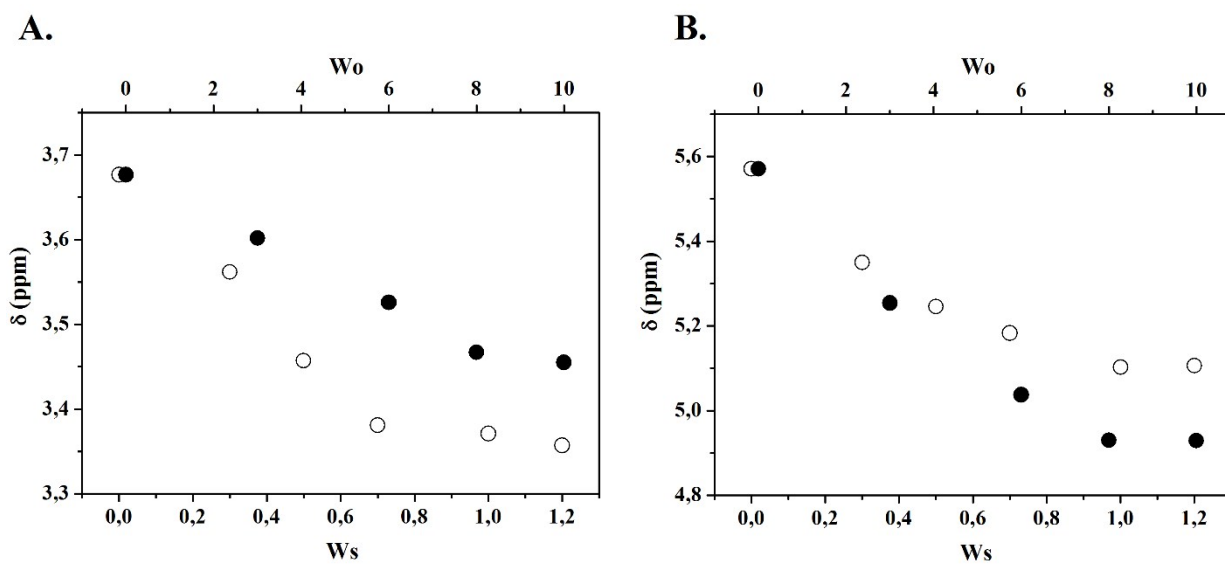

**Figure S5.** <sup>1</sup>H-NMR chemical shifts of BHDC protons in bmimBF<sub>4</sub>/BHDC/toluene (○) and water/BHDC/toluene (●) at different W. A).  $\beta$  protons and B).  $\alpha$  protons labels refer to Scheme 1. [BHDC] = 0.1 M.

**Table S2.** The interplanar gold crystal spacing ( $\text{\AA}$ ) and its corresponding HKL crystallographic values from the JCPDS-PDF 04-0784.

SYMMETRY. CUBIC

DIHKL. 2.3550 100. 1.00 1.00 1.00

DIHKL. 2.0390 52. 2.00 0.00 0.00

DIHKL. 1.1774 12. 2.00 2.00 2.00
